# Supplementary material for: Three-body interaction of gold nanoparticles: the role of solvent density and ligand shell orientation
Source: Royal Society of Chemistry journal article supplement (doi:10.1039/d3cp06334h), 2024-01-01
Supplement: d3cp06334h1.pdf [file d3cp06334h1.pdf]

## Supplementary Information for

# Three-body Interaction of Gold Nanoparticles: The Role of Solvent Density and Ligand Shell Orientation

*Hari O. S. Yadav*

<sup>1</sup> School of Computational and Integrative Sciences, Jawaharlal Nehru University, New Delhi,  
110067, India

\*Corresponding Author (Email: [hariomsyadav@mail.jnu.ac.in](mailto:hariomsyadav@mail.jnu.ac.in), [hariyadav.iitd@gmail.com](mailto:hariyadav.iitd@gmail.com))

Table 1. 12-6 Lennard-Jones parameters of non-bonded interactions for alkanethiol-passivated gold nanoparticles in supercritical ethane.

| Atom Types      | $\epsilon$ (kJ mol <sup>-1</sup> ) | $\sigma$ (Å) | Refs.    |
|-----------------|------------------------------------|--------------|----------|
| Au              | 3.2288                             | 2.737        | (S1, S2) |
| SH              | 1.6629                             | 4.450        | (S1, S2) |
| CH <sub>2</sub> | 0.3825                             | 3.950        | (S3)     |
| CH <sub>3</sub> | 0.8148                             | 3.750        | (S3)     |

Table 2. Bonded interaction parameters of alkanethiol. Intermolecular bonds are modeled using the harmonic stretching potential;  $U(r) = \frac{k_r}{2}(r - r_0)^2$ , where  $k_r$  is the force constant and  $r_0$  is the equilibrium bond length. Bond angles are modeled using the harmonic bending potential;  $U(\theta) = \frac{k_\theta}{2}(\theta - \theta_0)^2$ , where  $k_\theta$  is the force constant and  $\theta_0$  is the equilibrium bond angle. The triple cosine potential;  $U(\varphi) = \frac{A_1}{2}(1 + \cos(\varphi)) + \frac{A_2}{2}(1 - \cos(2\varphi)) + \frac{A_3}{2}(1 + \cos(3\varphi))$ , is employed for 1-4 torsional interactions, where  $A_1$ ,  $A_2$ , and  $A_3$  are constants. The gold-sulfur (Au – SH) interaction is modeled using the switched and shifted version (at 6.2 Å) of pairwise additive  $m - n$  potential;  $U(r) = \frac{E_0}{(n-m)}\left(m\left(\frac{r_0}{r}\right)^n - n\left(\frac{r_0}{r}\right)^m\right)$ ; where  $E_0$  is the well depth,  $r_0$  is the equilibrium distance,  $m$  and  $n$  are the constants.

| Interaction type | Interacting group                                                    | Potential parameters <sup>a</sup>                 | Refs.    |
|------------------|----------------------------------------------------------------------|---------------------------------------------------|----------|
| Bond             | CH <sub>2</sub> -CH <sub>x</sub>                                     | $k_r = 2250, r_0 = 1.54$                          | (S3, S4) |
|                  | CH <sub>2</sub> -SH                                                  | $k_r = 2250, r_0 = 1.82$                          | (S1, S4) |
| Angle            | CH <sub>2</sub> -CH <sub>2</sub> -CH <sub>x</sub> ;                  | $k_\theta = 519.6543$                             | (S3)     |
|                  | CH <sub>2</sub> -CH <sub>2</sub> -SH                                 | $\theta_0 = 114$                                  |          |
| Torsion          | CH <sub>2</sub> -CH <sub>2</sub> -CH <sub>2</sub> -CH <sub>x</sub> ; | $A_1 = 5.9038$                                    | (S3)     |
|                  | CH <sub>x</sub> -CH <sub>2</sub> -CH <sub>2</sub> -SH                | $A_2 = -1.1339$<br>$A_3 = 13.1588$                |          |
|                  | Au-SH                                                                | $E_0 = 38.6$<br>$r_0 = 2.9$<br>$m = 4$<br>$n = 8$ | (S2)     |

<sup>a</sup>The units of distance are in Angstrom, angles in degree and energy in kJ/mol.

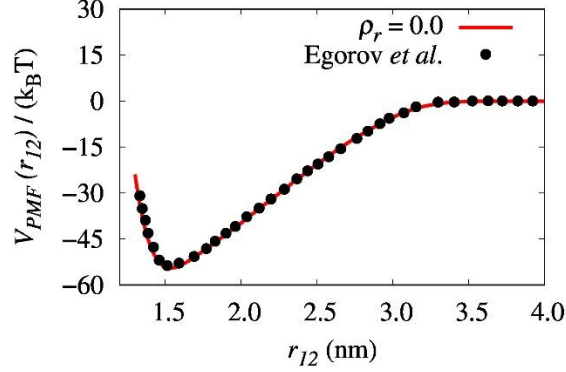

Figure 1. The comparison of two-body PMF of  $\text{Au}_{38}(\text{SC}_{10})_{24}$  nanoparticles computed in vacuum with the literature.<sup>S5</sup>

Table 3. Fitting parameters of pair  $V_{PMF}$  curves of two-body and three-body systems at different densities along isotherm,  $T_r = 1.02$  for  $\text{Au}_{38}(\text{SC}_{10})_{24}$  and  $\text{Au}_{140}(\text{SC}_{10})_{62}$  nanoparticles. The  $V_{PMF}$  curves for densities,  $\rho_r \leq 1.0$  are fitted with Morse function,  $D_e = \left( (1 - \exp(-a(r - r_e)))^2 - 1 \right)$  with  $a = \alpha/r_e$ , where  $D_e$  denotes the energy well depth and  $r_e$  represents the equilibrium pair separation. The  $V_{PMF}$  curves at density,  $\rho_r = 3.0$  are fitted to a function,  $B \exp(-b(r - r_d))$  with  $b = \beta/r_d$ , where  $B$  is the pre-exponential factor,  $b$  characterizes the softness of the PMF curves, and  $r_d$  is the onset of repulsion. Both  $\alpha$  and  $\beta$  are dimensionless range parameters.

| No. of<br>Particles | $\rho_r$ | $\text{Au}_{38}(\text{SC}_{10})_{24}$ |                                 |                                | $\text{Au}_{140}(\text{SC}_{10})_{62}$ |                                 |                                |
|---------------------|----------|---------------------------------------|---------------------------------|--------------------------------|----------------------------------------|---------------------------------|--------------------------------|
|                     |          | $D_e, B$<br>( $k_B T$ )               | $a, b$<br>( $\text{\AA}^{-1}$ ) | $r_e, r_d$<br>( $\text{\AA}$ ) | $D_e, B$<br>( $k_B T$ )                | $a, b$<br>( $\text{\AA}^{-1}$ ) | $r_e, r_d$<br>( $\text{\AA}$ ) |
| Two                 | 0.0      | 54.64                                 | 0.186                           | 15.46                          | 72.61                                  | 0.185                           | 25.01                          |
|                     | 0.1      | 45.49                                 | 0.164                           | 15.85                          | 58.03                                  | 0.165                           | 25.48                          |
|                     | 0.5      | 21.60                                 | 0.142                           | 17.15                          | 23.11                                  | 0.157                           | 27.82                          |
|                     | 1.0      | 12.98                                 | 0.178                           | 17.96                          | 12.15                                  | 0.188                           | 28.79                          |
|                     | 3.0      | 2.33                                  | 0.398                           | 20.38                          | 2.36                                   | 0.367                           | 31.68                          |
| Three               | 0.0      | 32.86                                 | 0.178                           | 17.81                          | 46.98                                  | 0.158                           | 26.88                          |
|                     | 0.1      | 28.10                                 | 0.164                           | 18.23                          | 38.96                                  | 0.155                           | 28.05                          |
|                     | 0.5      | 14.25                                 | 0.142                           | 20.14                          | 17.82                                  | 0.112                           | 30.97                          |
|                     | 1.0      | 6.48                                  | 0.143                           | 21.71                          | 6.71                                   | 0.115                           | 33.44                          |
|                     | 3.0      | 1.28                                  | 0.328                           | 24.79                          | 1.31                                   | 0.319                           | 36.47                          |

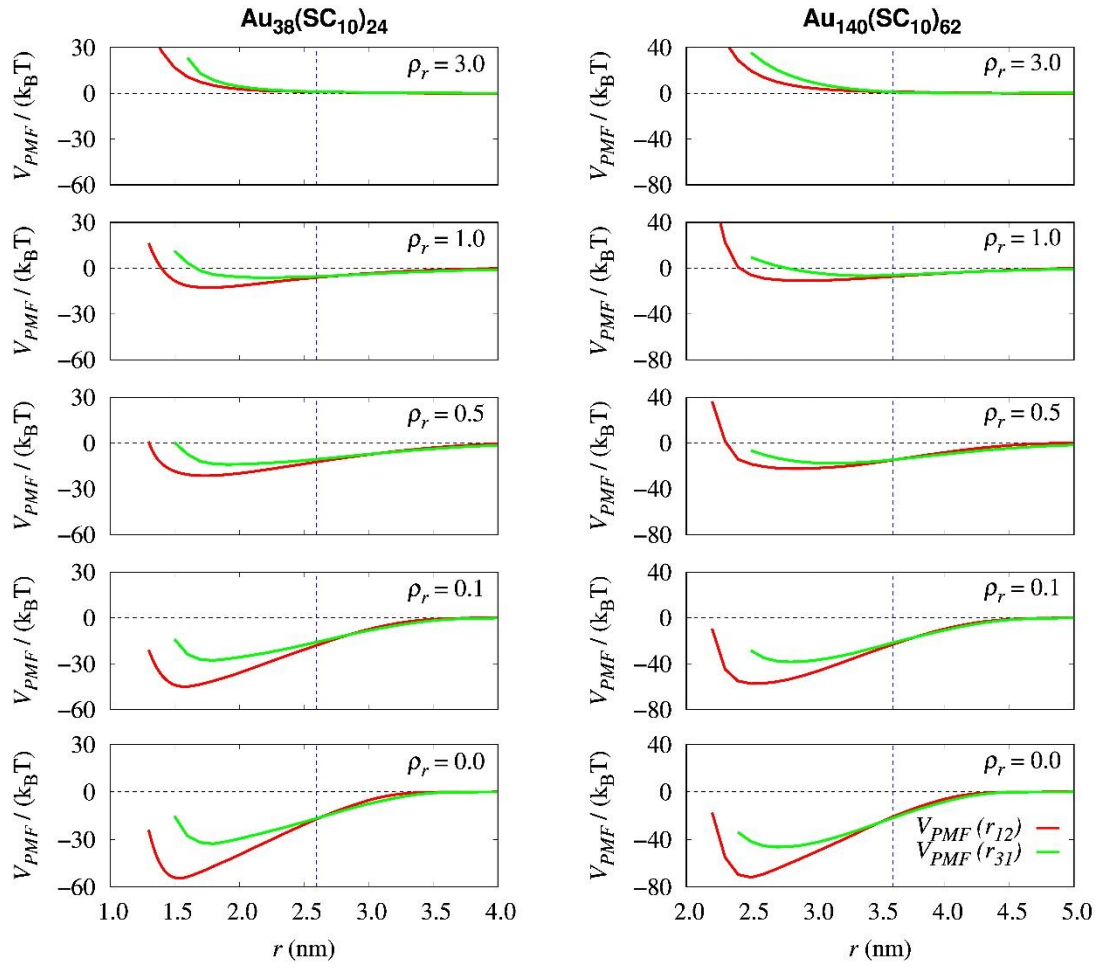

Figure 2. The comparison of  $V_{PMF}(r)$  obtained from two- and three-body interactions at different  $\rho_r$  for  $\text{Au}_{38}(\text{SC}_{10})_{24}$  (left column) and  $\text{Au}_{140}(\text{SC}_{10})_{62}$  (right column) nanoparticles.

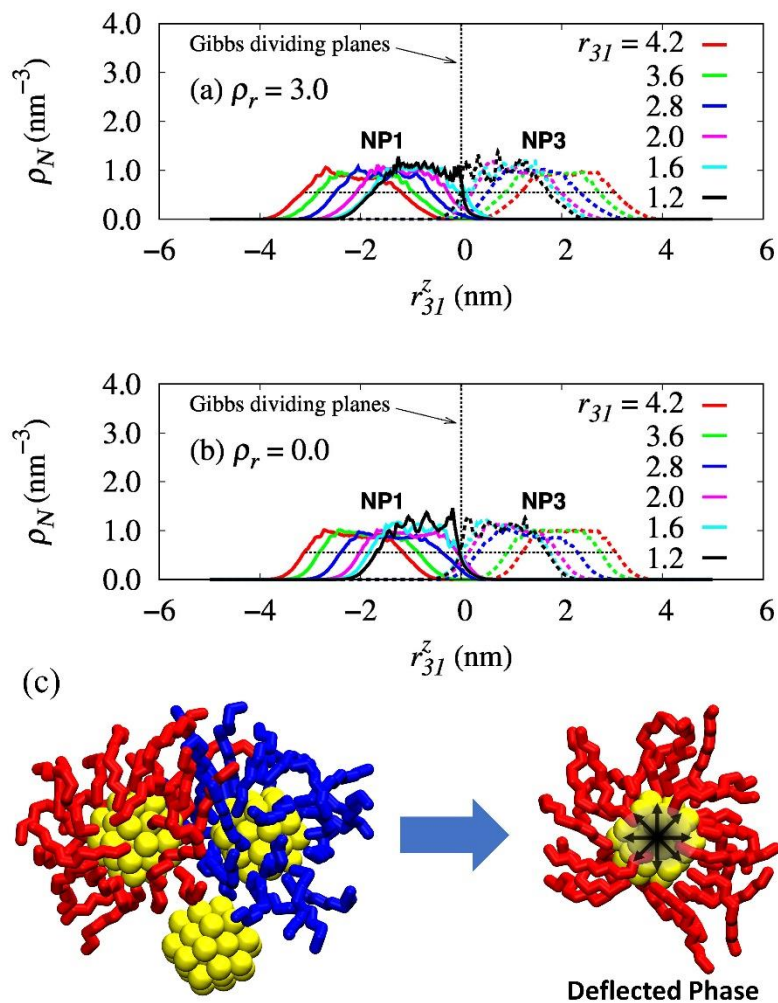

Figure 3. The number density distributions,  $\rho_N$ , of ligand shells in three-body interaction along pair separation,  $r_{31}$ , at (a)  $\rho_r = 3.0$ , and (b)  $\rho_r = 0.0$ , for  $\text{Au}_{38}(\text{SC}_{10})_{24}$  nanoparticles. (c) The visual of deflected phase of ligands at closet separation, i.e., at  $r_{31} = 1.2$  nm.

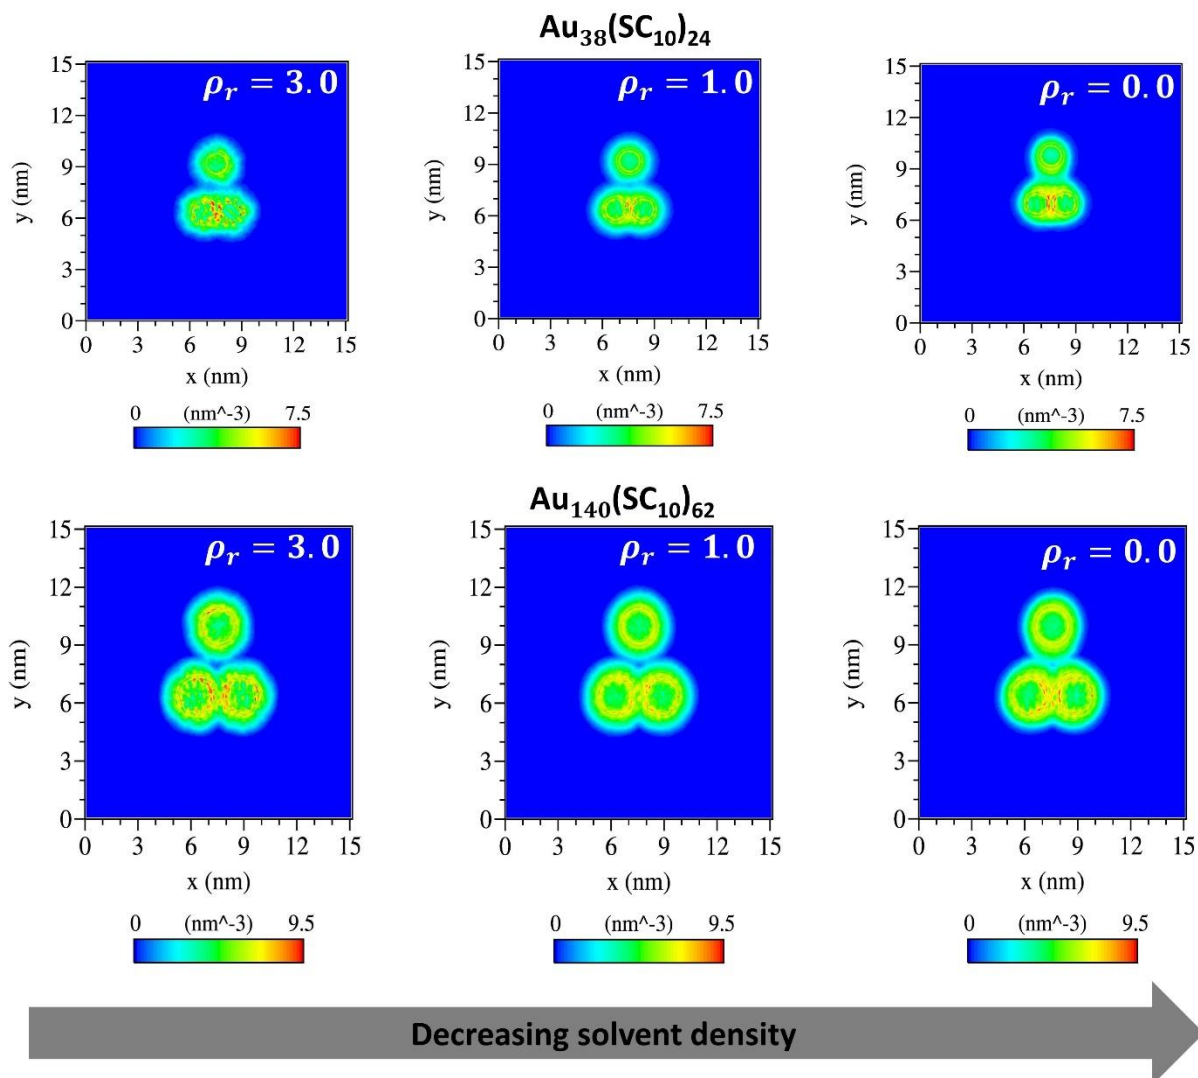

Figure 4. Two-dimensional density map of ligand shells at intermediate separation as a function of solvent density,  $\rho_r$ , for  $\text{Au}_{38}(\text{SC}_{10})_{24}$  (upper row) and  $\text{Au}_{140}(\text{SC}_{10})_{62}$  (lower row) nanoparticles.

## REFERENCES

- (S1) Landman, U.; Luedtke, W. D. Small Is Different: Energetic, Structural, Thermal, and Mechanical Properties of Passivated Nanocluster Assemblies. *Faraday Discuss* **2004**, *125*, 1–22.
- (S2) Tay, K.; Bresme, F. Computer Simulations of Two-Dimensional Gold Nanoparticle Arrays: The Influence of Core Geometry. *Mol Simulat* **2005**, *31* (6–7), 515–526.
- (S3) Martin, M. G.; Siepmann, J. I. Transferable Potentials for Phase Equilibria. 1. United-Atom Description of n-Alkanes. *J Phys Chem B* **1998**, *102* (97), 2569–2577.
- (S4) Chopra, R.; Truskett, T. M.; Errington, J. R. On the Use of Excess Entropy Scaling To Describe Single-Molecule and Collective Dynamic Properties of Hydrocarbon Isomer Fluids. *J Phys Chem B* **2010**, *114* (49), 16487–16493.
- (S5) Patel, N.; Egorov, S. A. Interactions between Sterically Stabilized Nanoparticles in Supercritical Fluids: A Simulation Study. *J Chem Phys* **2007**, *126* (5), 054706.
